Figure S1

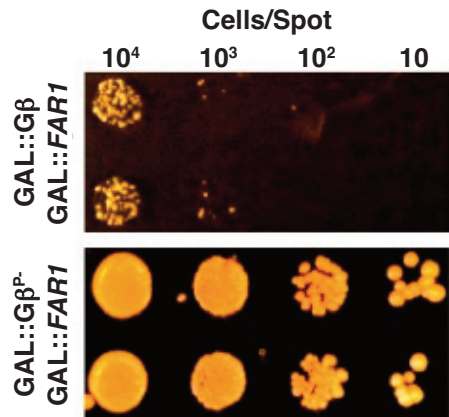

**Figure S1.** G $\beta$  overexpression genetic assay. 15Dau *bar1* $\Delta$  cultures co-transformed with pESC/GAL1-FAR1 and either YCplac111/GAL1-STE4 or YCplac111/GAL1-STE4<sup>T320A S335A</sup> were grown to mid-log phase ( $\sim 10^7$  cells/ml) in selective sucrose medium. 10-fold serial dilutions from  $10^5$  to 1 were then spotted on selective galactose medium (to induce the overexpression of Far1, and G $\beta$  or G $\beta^{P-}$ ) and selective glucose medium (to repress *GALI*-driven gene expression), and incubated at 30°C for 48 hr. Ten transformants of each strain were tested. Results for two representative strains of each type are shown. Far1 overexpression rescued overexpression of G $\beta^{P-}$  but not of G $\beta$ . All strains grew similarly on glucose-containing medium.

Figure S2

A

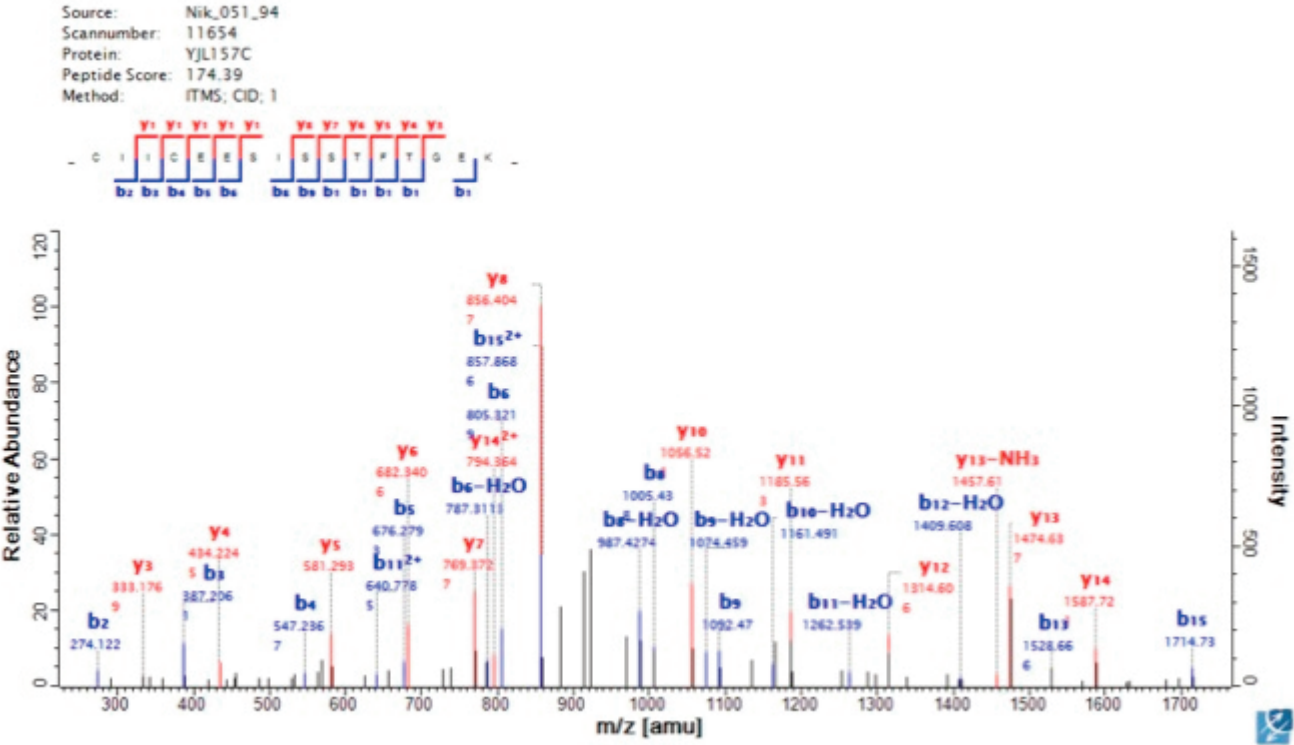

B

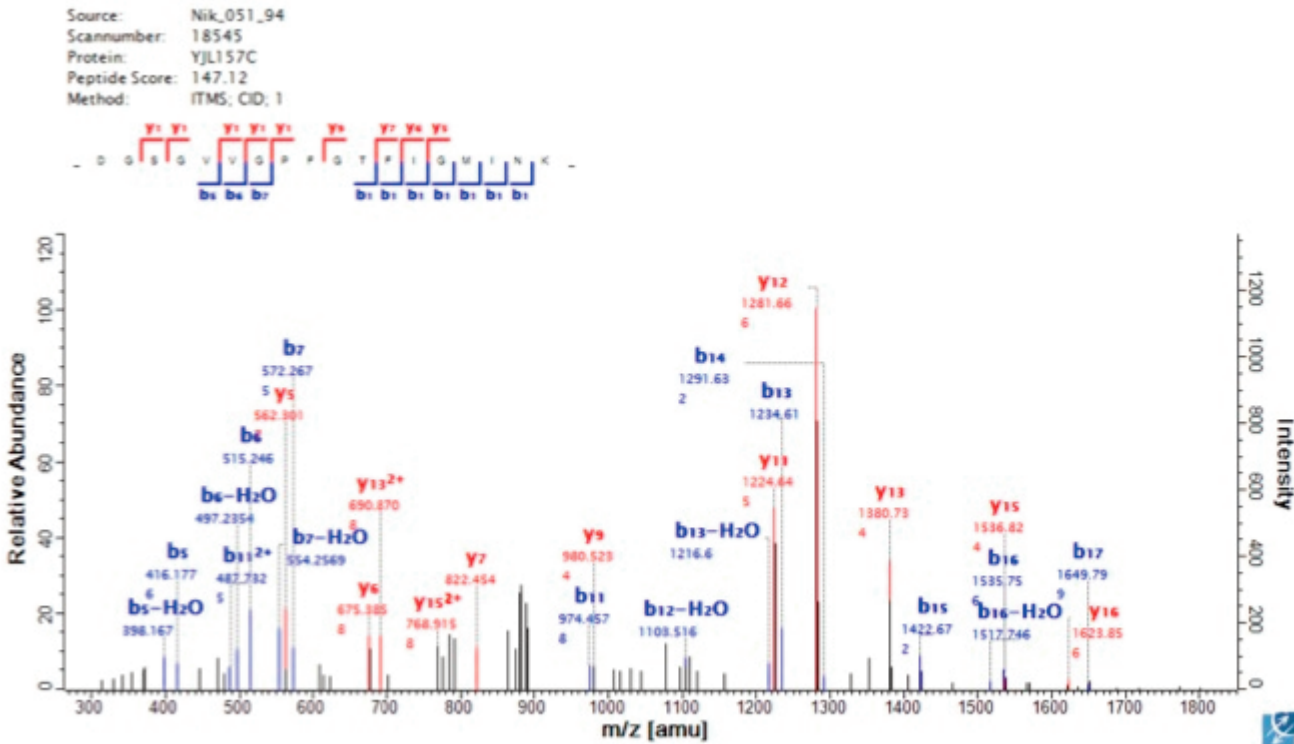

**Figure S1.** Detection of Far1 in the G $\beta^P$ - $\gamma$  pull-down. Pull-downs were performed as described in Cismowski et al. (2001). The proteins eluted from the Ni-NTA beads were separated by SDS-PAGE, digested by trypsin, and analyzed by nano-scale LC-MS/MS as previously described (Alldridge et al., 2008; Metodiev, 2011). The LTQ/Orbitrap Velos was operated in data-dependent mode where the high-resolution Orbitrap analyzer first executed two full scans at a resolution of 30,000 (at 400 m/z), followed by 20 MS/MS scans in the LTQ Velos analyzer to isolate and sequence the 20 most abundant peptide ions (Greenwood et al., 2012). Internal mass calibration was maintained using a lock mass ion of 445.12 m/z. Raw MS/MS data were analyzed by MaxQuant and X! Tandem as described previously (Greenwood et al., 2012; Cox and Mann, 2008; Cox et al., 2011). Each sample was analysed in triplicate by LC-MS/MS. Two high-scoring MS/MS spectra from LC-MS/MS runs analyzing the 94kDa fraction of the G $\beta^P$ - $\gamma$  pull-down sample are shown. (A) An MS/MS spectrum matching a peptide with sequence **CIICEESISSTFTGEK** from Far1. Andromeda, the search engine of MaxQuant, matched the spectrum to the peptide with a score of 174 and peptide expectation value (PEP) of 1.54E-06. (B) An MS/MS spectrum matching a peptide with sequence **DGSGVVGPFGTFIGMINK** from Far1. Andromeda matched the spectrum to the peptide with a score of 147 and PEP of 3.32E-08. The sequence-specific y and b fragment ion series are shown in red and blue as assigned by MaxQuant. For statistical analysis of spectral count data, the MS/MS data were filtered at 1% FDR at both the peptide and protein levels, and the filtered data was used to quantify the proteins using the spectral counting approach. The significance of the obtained differences in spectral counts reported by MaxQuant or X!Tandem were analyzed by the G-test (Greenwood et al. 2012), which does not require the data to be distributed normally (Heinecke, et al., 2010). Far1 was detected with a total of 19 spectral counts (7, 6, and 6 in the three separate replicates) and with 0 counts in the G $\beta^P$ - $\gamma$  and WT pull-downs, respectively. If the affinities of G $\beta^P$ - $\gamma$  and G $\beta$  $\gamma$  for Far1 were similar, the total counts expected for Far1 in the WT pull-down would be 14 rather than 0 after normalizing for the amount of G $\beta$  $\gamma$  on the beads ( $p = 0.00013$ ).

## REFERENCES

- Alldrige, L., Metodieva, G., Greenwood, C., Al-Janabi, K., Thwaites, L., Sauven, P., and Metodiev, M.** (2008). Proteome profiling of breast tumors by gel electrophoresis and nanoscale electrospray ionization mass spectrometry. *J Proteome Res* **7**:1458-69.
- Cismowski, M. J., Metodiev, M. V., Draper, E. M. and Stone, D. E.** (2001). Biochemical analysis of yeast G $\alpha$  mutants that enhance adaptation to pheromone. *Biochem. Biophys. Res. Comm.* **284**, 247-254.
- Cox, J. and Mann, M.** (2008). MaxQuant enables high peptide identification rates, individualized p.p.b.-range mass accuracies and proteome-wide protein quantification. *Nat Biotechnol* **26**, 1367-72.
- Cox, J., Neuhauser, N., Michalski, A., Scheltema, R. A., Olsen, J. V., and Mann, M.** (2011). Andromeda: a peptide search engine integrated into the MaxQuant environment. *J Proteome Res* **10**, 1794-805.
- Greenwood, C., Metodieva, G., Al-Janabi, K., Lausen, B., Alldrige, L., Leng, L., Bucala, R., Fernandez, M., and Metodiev, M. V.** (2012). Stat1 and CD74 overexpression is co-dependent and linked to increased invasion and lymph node metastasis in triple-negative breast cancer. *J. Proteomics* **75**, 3031-40.
- Heinecke, N. L., Pratt, B. S., Vaisar, T., and Becker, L.** (2010). PepC: proteomics software for identifying differentially expressed proteins based on spectral counting. *Bioinformatics* **26**, 1574-5.
- Metodiev, M. V.** (2011). Applications of nanoscale liquid chromatography coupled to Tandem mass spectrometry in quantitative studies of protein expression, protein-protein interaction, and protein phosphorylation. *Methods Mol Biol* **790**, 99-113.

**Supplementary Table 1. Yeast strains used in this study**

| Strain | Genotype                                                                                                       | Source     |
|--------|----------------------------------------------------------------------------------------------------------------|------------|
| DSY257 | <i>MATa bar1Δ ade1 his2 leu2-3, 112 trp1-1a ura3Δ</i>                                                          | Stone lab  |
| ELY104 | <i>MATa bar1Δ ade1 his2 leu2-3, 112 trp1-1a ura3Δ ste4::URA3</i>                                               | Stone lab  |
| RDY114 | <i>MATa ste4<sup>T320A S335A</sup> bar1Δ ade1 his2 leu2-3, 112 trp1-1a ura3Δ</i>                               | This study |
| RDY103 | <i>MATa bud1Δ::KAN bar1Δ ade1 his2 leu2-3, 112 trp1-1a ura3Δ</i>                                               | This study |
| RDY120 | <i>MATa ste4<sup>T320A S335A</sup> bud1Δ::KAN bar1Δ ade1 his2 leu2-3, 112 trp1-1a ura3Δ</i>                    | This study |
| MMY110 | <i>MATa gpa1Δ::URA3 bud1Δ::KAN bar1Δ ade1 his2 leu2-3, 112 trp1-1a ura3Δ YCplac22/gpa1<sup>K21E R22E</sup></i> | This study |
| MMY111 | <i>MATa gpa1Δ::URA3 bud1Δ::KAN bar1Δ ade1 his2 leu2-3, 112 trp1-1a ura3Δ YCplac22/GPA1</i>                     | This study |
|        | <i>MATa gpa1Δ::URA3 bar1Δ ade1 his2 leu2-3, 112 trp1-1a ura3Δ YCplac22/gpa1<sup>K21E R22E</sup></i>            | This study |
| RDY130 | <i>MATa ste4::URA3 GFP-STE4::ura3 bud1Δ::KAN bar1Δ ade1 his2 leu2-3, 112 trp1 ura3</i>                         | This study |
| RDY132 | <i>MATa ste4::URA3 GFP- ste4<sup>T320A S335A</sup>::ura3 bud1Δ::KAN bar1Δ ade1 his2 leu2-3, 112 trp1 ura3Δ</i> | This study |
| RDY126 | <i>MATa ste4::URA3 GFP-STE4::ura3 bar1Δ ade1 his2 leu2-3, 112 trp1 ura3</i>                                    | This study |
| RDY139 | <i>MATa ste4::URA3 GFP- ste4<sup>T320A S335A</sup>::ura3 bar1Δ ade1 his2 leu2-3, 112 trp1 ura3Δ</i>            | This study |
| DSY246 | <i>MATa bar1Δ ade1 his2 leu2-3, 112 trp1-1a ura3Δ</i>                                                          | Stone lab  |

|        |                                                                                                                                                                                                                                                                   |            |
|--------|-------------------------------------------------------------------------------------------------------------------------------------------------------------------------------------------------------------------------------------------------------------------|------------|
| RDY217 | <i>MAT<math>\alpha</math> ste4<sup>T320A S335A</sup> bar1<math>\Delta</math> ade1 his2 leu2-3, 112 trp1-1a ura3<math>\Delta</math></i>                                                                                                                            | This study |
| RDY246 | <i>MAT<math>\alpha</math> bud1<math>\Delta</math>::KAN bar1<math>\Delta</math> ade1 his2 leu2-3, 112 trp1-1a ura3<math>\Delta</math></i><br>pRS406/SPA2-GFP                                                                                                       | This study |
| RDY247 | <i>MAT<math>\alpha</math> ste4<sup>T320A S335A</sup> bud1<math>\Delta</math>::KAN bar1<math>\Delta</math> ade1 his2 leu2-3, 112</i><br><i>trp1-1a ura3<math>\Delta</math> pRS406/SPA2-GFP</i>                                                                     | This study |
| RDY259 | <i>MAT<math>\alpha</math> bud1<math>\Delta</math>::KAN bar1<math>\Delta</math> ade1 his2 leu2-3, 112 trp1-1a ura3<math>\Delta</math></i><br>pRS424/GFP-CDC42                                                                                                      | This study |
| RDY260 | <i>MAT<math>\alpha</math> ste4<sup>T320A S335A</sup> bud1<math>\Delta</math>::KAN bar1<math>\Delta</math> ade1 his2 leu2-3, 112</i><br><i>trp1-1a ura3<math>\Delta</math> pRS424/GFP-CDC42</i>                                                                    | This study |
| EAY106 | <i>MAT<math>\alpha</math> bud1<math>\Delta</math>::KAN bar1<math>\Delta</math> ade1 his2 leu2-3, 112 trp1-1a ura3<math>\Delta</math></i><br>pRS304/STE2 <sup>7XR/GPAAD</sup>                                                                                      | This study |
| EAY107 | <i>MAT<math>\alpha</math> ste4<sup>T320A S335A</sup> bud1<math>\Delta</math>::KAN bar1<math>\Delta</math> ade1 his2 leu2-3, 112</i><br><i>trp1-1a ura3<math>\Delta</math> pRS304/STE2<sup>7XR/GPAAD</sup></i>                                                     | This study |
| ODY111 | <i>MAT<math>\alpha</math> bar1<math>\Delta</math> ade1 his2 leu2-3, 112 trp1-1a ura3<math>\Delta</math></i><br>YCplac111/GAL1-Ste4 pESC /GAL10-FLAG-Far1                                                                                                          | This study |
| ODY113 | <i>MAT<math>\alpha</math> bar1<math>\Delta</math> ade1 his2 leu2-3, 112 trp1-1a ura3<math>\Delta</math></i><br>YCplac111/GAL1- ste4 <sup>T320A S335A</sup> pESC /GAL10-FLAG-Far1                                                                                  | This study |
| NWY051 | <i>MAT<math>\alpha</math> bar1<math>\Delta</math> ade1 his2 leu2-3, 112 trp1-1a ura3<math>\Delta</math> ste18<math>\Delta</math>::URA3</i><br><i>lys1<math>\Delta</math>::KanMX arg5/arg6<math>\Delta</math>::G418 YCplac111/GAL1- ste4<sup>T320A S335A</sup></i> | This study |
| NWY052 | <i>MAT<math>\alpha</math> bar1<math>\Delta</math> ade1 his2 leu2-3, 112 trp1-1a ura3<math>\Delta</math> ste18<math>\Delta</math>::URA3</i><br><i>lys1<math>\Delta</math>::KanMX arg5/arg6<math>\Delta</math>::G418 YCplac111/GAL1-Ste4</i>                        | This study |

**Strain construction:** All strains used in this study were derived from strain 15Dau (*MATa bar1Δ ade1 his2 leu2-3, -112 trp1 ura3D*), which is congenic with strain BF264-15D (Reed et al. 1985). RDY114 was generated by *in situ* transplacement of *ste4Δ::URA3* in strain ELY104 (Li et al., 1998b) with *ste4*<sup>T320A S335A</sup>, excised as an *EcoRI-SphI* fragment from the plasmid YCplac33/*ste4*<sup>T320A S335A</sup> (Li et al., 1998a). Recombinants were selected on 5'FOA and confirmed by sequencing. The *BUDI/RSRI* locus was deleted in strains 15Dau *bar1Δ* and RDY114 to create strains RDY103 and RDY120, respectively, using a *bud1Δ::KANMX4* cassette which was PCR-amplified from pFA6a-Kan (Wach, 1996) using the oligomers 5'- GCGCATTCATCCTCGACATTCTCAAACGCGAAATATCGTCGAACGTACGCTGCAG GTCGACGG - 3' and 5'- GTTGTGAAGTAGCGCTAATTCCTGTCCTGTTGCTAGAACAGATA TCGATGAATTCGAGCTCG - 3'. GFP-tagging was performed *in situ* by transplacement of an excised *EcoRI-SmaI* fragment from pRS316/*STE4p-GFP-STE4* (Kim et al., 2000) or pRS316/*STE4p-GFP-ste4*<sup>T320A S335A</sup> (RDB122, see construction below) into strain ELY104 to create strains RDY126 and RDY139, respectively. The *BUDI/RSRI* locus was deleted as described above in strains RDY126 and RDY139 to create strains RDY130 and RDY132, respectively. RDY114 was transformed with pGAL-HO and the mating type was switched to generate RDY217 as described (Guthrie and Fink, 2002). Strains EAY106 and EAY107 were created by transforming pRS304/*STE2*<sup>7XR/GPAAD</sup> cut with *BsmI* into strains RDY103 and RDY120, respectively, and confirmed by sequencing.

## REFERENCES

- Guthrie, C. and Fink, G. R.** (2002). Guide to Yeast Genetics and Molecular Biology. San Diego, CA.: Academic Press.
- Kim, J., Bortz, E., Zhong, H., Leeuw, T., Leberer, E., Vershon, A. K. and Hirsch, J. P.** (2000). Localization and signaling of Gβ subunit Ste4p are controlled by a-Factor receptor and the a-specific protein Asg7p. *Mol. Cell. Biol.* **20**, 8826-8835.
- Li, E., Cismowski, M. J. and Stone, D. E.** (1998a). Phosphorylation of the pheromone-responsive Gbeta protein of *Saccharomyces cerevisiae* does not affect its mating-specific signaling function. *Mol Gen Genet* **258**, 608-18.
- Li, E., Meldrum, E., Stratton, H. and Stone, D. E.** (1998b). Substitutions in the pheromone responsive Gβ protein of *Saccharomyces cerevisiae* confer a defect in recovery from pheromone treatment. *Genetics* **148**, 947-961.



**Reed, S. I., Hadwiger, J. A., and Lorincz, A. T.** (1985). Protein kinase activity associated with the product of the yeast cell division cycle gene CDC28. *Proc Natl Acad Sci USA* **82**, 4055-4059.

**Wach, A.** (1996). PCR-synthesis of marker cassettes with long flanking homology regions for gene disruptions in *S. cerevisiae*. *Yeast* **12**, 259-265.

**Supplementary Table 2. Plasmids used in this study**

| Plasmid no | Plasmid name                                | Marker/Type    | Source                    |
|------------|---------------------------------------------|----------------|---------------------------|
| DSB159     | YCplac22/GPA1                               | TRP1/CEN       | (Stratton et al., 1996)   |
| MMB104     | YCplac22/gpa1 <sup>K21E R22E</sup>          | TRP1/CEN       | (Metodiev et al., 2002)   |
| RDB116     | YCplac33/ste4 <sup>T320A S335A</sup>        | URA3/CEN       | (Li et al., 1998a)        |
| BLT49      | pRS316/GFP-Ste4                             | URA3/CEN       | (Kim et al., 2000)        |
| RDB122     | pRS316/GFP- ste4 <sup>T320A S335A</sup>     | URA3/CEN       | This study                |
| RDB151     | pRS406/Spa2-GFP                             | URA3/INT       | (Arkowitz and Lowe, 1997) |
| DLB2823    | pRS305/Bem1-GFP-Snc2                        | LEU2/INT       | (Howell et al., 2009)     |
|            | pRS424/GFP-Cdc42                            | URA3/2 $\mu$ m | (Barale et al., 2006)     |
| DLB3217    | pRS304/STE2 <sup>7XR/GPAAD</sup>            | TRP1/INT       | Lew lab                   |
| MCB26      | YCplac111/GAL1-Ste4                         | LEU2/CEN       | (Cismowski et al., 2001)  |
| RDB131     | YCplac111/GAL1- ste4 <sup>T320A S335A</sup> | LEU2/CEN       | This study                |
| pEB15.1    | pESC /GAL10-FLAG-Far1                       | URA3/2 $\mu$ m | This study                |

**Plasmid construction:** The plasmids used in this study are listed in Table S2. RDB122 was created by sequential site-directed mutagenesis of pRS316/*STE4p-GFP-STE4*, and YCplac111/GAL1- *STE4*<sup>T320A S335A</sup> was created by sequential site-directed mutagenesis of YCplac111/GAL1- *STE4*, using QuikChange II XL kit (Qiagen). The oligomers used to create the T320A mutation were

5'- CGAGGTTATGAAGAACGTACCCCTGCCCCTACTTATATGGCAGC - 3' and  
 5'- GCTGCCATATAAGTAGGGGCAGGGGTACGTTCTTCATAACCTCG - 3'. The oligomers used to create the sequential S335A mutation were

5' - GGAGTACAATACCGCGCAAGCGCCACAACTTTAAAATCAAC -3' and  
 5' - GTTGATTTTAAAGTTTGTGGCGCTTGCGCGGTATTGTACTCC - 3'. To create

pEB15.1 (pESC/GAL10-FLAG-FAR1), *FAR1* was PCR-amplified from strain15Dau genomic DNA and the product was cloned into pESC-URA as a PacI-BglII fragment, thereby placing *FAR1* under *GAL10* promoter control. The priming oligonucleotides were:

5' - CCTTAATTAAGCGTAGTATAGACGTGGAG - 3' and

5' - GAAGATCTTGAAGACACCAACAAGAGTTTCG - 3'.

## REFERENCES

- Arkowitz, R. A. and Lowe, N.** (1997). A small conserved domain in the yeast Spa2p is necessary and sufficient for its polarized localization. *J Cell Biol* **138**, 17-36.
- Barale, S., McCusker, D. and Arkowitz, R. A.** (2006). Cdc42p GDP/GTP cycling is necessary for efficient cell fusion during yeast mating. *Mol Biol Cell* **17**, 2824-38.
- Cismowski, M. J., Metodiev, M. V., Draper, E. M. and Stone, D. E.** (2001). Biochemical analysis of yeast  $G\alpha$  mutants that enhance adaptation to pheromone. *Biochem. Biophys. Res. Comm.* **284**, 247-254.
- Howell, A. S., Savage, N. S., Johnson, S. A., Bose, I., Wagner, A. W., Zyla, T. R., Nijhout, H. F., Reed, M. C., Goryachev, A. B. and Lew, D. J.** (2009). Singularity in polarization: rewiring yeast cells to make two buds. *Cell* **139**, 731-43.
- Kim, J., Bortz, E., Zhong, H., Leeuw, T., Leberer, E., Vershon, A. K. and Hirsch, J. P.** (2000). Localization and signaling of  $G\beta$  subunit Ste4p are controlled by a-Factor receptor and the a-specific protein Asg7p. *Mol. Cell. Biol.* **20**, 8826-8835.
- Li, E., Cismowski, M. J. and Stone, D. E.** (1998a). Phosphorylation of the pheromone-responsive  $G\beta$  protein of *Saccharomyces cerevisiae* does not affect its mating-specific signaling function. *Mol Gen Genet* **258**, 608-18.
- Metodiev, M. V., Matheos, D., Rose, M. D. and Stone, D. E.** (2002). Regulation of MAPK function by direct interaction with the mating-specific Galpha in yeast. *Science* **296**, 1483-6.
- Stratton, H. F., Zhou, J., Reed, S. I. and Stone, D. E.** (1996). The mating-specific  $G\alpha$  protein of *Saccharomyces cerevisiae* downregulates the mating signal by a mechanism that is dependent on pheromone and independent of  $G\beta\gamma$  sequestration. *Mol. Cell. Biol.* **16**, 6325-6337.
